# Supplementary material for: The Experimental Proteome of Leishmania infantum Promastigote and Its Usefulness for Improving Gene Annotations
Source: Genes (Basel). 2020 Sep 2;11(9):1036. doi: 10.3390/genes11091036 (PMC7563732; doi:10.3390/genes11091036)
Supplement: Supplementary file 1 [file genes-11-01036-s001.xlsx]

## Sheet: ReadMe
The experimental proteome of Leishmania infantum promastigote and its usefulness for improving gene annotations
África Sanchiz, Esperanza Morato, Alberto Rastrojo, Esther Camacho, Sandra González-de la Fuente, Anabel Marina, Begoña Aguado and Jose M. Requena
Centro de Biología Molecular “Severo Ochoa” (CBMSO, CSIC-UAM) Campus de Excelencia Internacional (CEI) UAM+CSIC, Universidad Autónoma de Madrid, 28049 Madrid, Spain

## Sheet: Table S1
Table S1. Proteins detected in L. infantum promastigotes whose orthologues in L. donovani were found to be only expressed in the amastigote stage (Nirujogi et al, 2014)
Nirujogi, R.S., Pawar, H., Renuse, S., Kumar, P., Chavan, S., Sathe, G., Sharma, J., Khobragade, S., Pande, J., Modak, B., et al. (2014). Moving from unsequenced to sequenced genome: reanalysis of the proteome of Leishmania donovani. J Proteomics 97, 48–61.
gene_ID (L. infantum)	Gene_ID (L. donovani)	Unique peptides	Description
LINF_010007100	LDBPK_010220	3	cyclophilin 12 - putative
LINF_010008000	LDBPK_010310	5	acidocalcisomal exopolyphosphatase - putative
LINF_010011000	LDBPK_010610	1	KREL1
LINF_010011300	LDBPK_010640	6	hypothetical protein - conserved
LINF_010013100	LDBPK_010820	1	hypothetical protein - conserved
LINF_020005900	LDBPK_020070	6	hypothetical protein - conserved
LINF_020006700	LDBPK_020170	3	phosphoglycan beta 1 -3 galactosyltransferase
LINF_020006800	LDBPK_020170	3	phosphoglycan beta 1 -3 galactosyltransferase
LINF_020006900	LDBPK_020170	3	phosphoglycan beta 1 -3 galactosyltransferase
LINF_020007000	LDBPK_020170	3	phosphoglycan beta 1 -3 galactosyltransferase
LINF_020007100	LDBPK_020170	3	phosphoglycan beta 1 -3 galactosyltransferase
LINF_020008100	LDBPK_020280	25	Soluble NSF attachment protein - SNAP - putative
LINF_020011800	LDBPK_020620	2	hypothetical protein - conserved
LINF_030012100	LDBPK_030690	1	Aminoacyl-tRNA editing domain containing protein - putative
LINF_040007000	LDBPK_040180	8	surface antigen-like protein
LINF_050012600	LDBPK_050740	2	Vta1 like - putative
LINF_070008100	LDBPK_070450	6	Uncharacterised protein family (UPF0172) - putative
LINF_080006100	LDBPK_080120	3	hypothetical protein - conserved
LINF_090018300	LDBPK_091160	1	hypothetical protein - conserved
LINF_090019000	LDBPK_091230	1	hypothetical protein - conserved
LINF_090022900	LDBPK_091610	1	Leucine Rich repeat - putative
LINF_100018400	LDBPK_101200	13	PAB1-binding protein - putative
LINF_110005600	LDBPK_110070	8	GRIP domain containing protein - putative
LINF_110010600	LDBPK_110580	2	tetratricopeptide repeat (TPR) protein
LINF_120008700	LDBPK_120310	3	Glutathione S-transferase - N-terminal domain containing protein - putative
LINF_120016200	LDBPK_120800	4	hypothetical protein - conserved
LINF_130015200	LDBPK_130920	1	hypothetical protein - conserved
LINF_140006400	LDBPK_140150	3	60S ribosomal protein - putative
LINF_140009200	LDBPK_140400	2	hypothetical protein - conserved
LINF_140017700	LDBPK_141210	1	Cold-shock' DNA-binding domain containing protein - putative
LINF_150006600	LDBPK_150170	7	protein phosphatase 2C - putative
LINF_150019500	LDBPK_151190	8	60S acidic ribosomal protein P2
LINF_150019600	LDBPK_151190	8	60S acidic ribosomal protein P2
LINF_150021000	LDBPK_151340	2	Eukaryotic translation initiation factor 4 gamma type 2 - putative
LINF_160015600	LDBPK_161090	7	Protein of unknown function (DUF3184) - putative
LINF_160015700	LDBPK_161090	7	Protein of unknown function (DUF3184) - putative
LINF_160015800	LDBPK_161090	7	Protein of unknown function (DUF3184) - putative
LINF_160015850	LDBPK_161090	7	Protein of unknown function (DUF3184) - putative
LINF_160015900	LDBPK_161090	7	Protein of unknown function (DUF3184) - putative
LINF_180021900	LDBPK_181620	4	hypothetical protein - conserved
LINF_190005500	LDBPK_190060	1	peroxin 13 - putative
LINF_190009800	LDBPK_190490	1	hypothetical protein - conserved
LINF_190010100	LDBPK_190520	6	hypothetical protein - conserved
LINF_200012700	LDBPK_200790	2	Tubulin/FtsZ family - putative
LINF_200014400	LDBPK_200960	1	conserved protein - unknown function
LINF_200017900	LDBPK_201310	7	Domain of unknown function (DUF1935) - putative
LINF_210007600	LDBPK_210280	3	calmodulin-like protein
LINF_210008100	LDBPK_210330	2	protein kinase - putative
LINF_210020600	LDBPK_211490	13	adenylate kinase - putative
LINF_210021300	LDBPK_211560	2	hypothetical protein - conserved
LINF_210026000	LDBPK_211990	2	calcineurin b subunit
LINF_230006600	LDBPK_230170	2	Leucine Rich repeat - putative
LINF_230012700	LDBPK_230670	4	Galactose oxidase - central domain containing protein - putative
LINF_230017300	LDBPK_231080	1	Putative S-adenosyl-L-methionine-dependent methyltransferase - putative
LINF_240007200	LDBPK_240240	1	ATP-dependent DEAD/H RNA helicase - putative
LINF_240012200	LDBPK_240730	1	mitochondrial translocase subunit - putative
LINF_240024500	LDBPK_241920	5	hypothetical protein - conserved
LINF_260009200	LDBPK_260410	3	pseudouridylate synthase-like protein
LINF_260009700	LDBPK_260460	3	hypothetical protein - conserved
LINF_260013200	LDBPK_260790	13	aspartate--ammonia ligase - putative
LINF_260017600	LDBPK_261240	1	hypothetical protein - conserved
LINF_260018600	LDBPK_261340	3	hypothetical protein - conserved
LINF_270007200	LDBPK_270230	2	hypothetical protein - conserved
LINF_270007400	LDBPK_270230	2	hypothetical protein - conserved
LINF_290007800	LDBPK_290290	2	D-lactate dehydrogenase-like protein
LINF_290016000	LDBPK_291100	1	putative oxidoreductase
LINF_290021000	LDBPK_291560	2	hypothetical protein - conserved
LINF_300007100	LDBPK_300210	2	ribosomal RNA adenine dimethylase family protein - putative
LINF_300009400	LDBPK_300440	2	quiescin sulfhydryl oxidase - putative
LINF_300009500	LDBPK_300450	2	Ribosome recycling factor - putative
LINF_300010800	LDBPK_300590	2	spliceosome-associated protein - putative
LINF_300013100	LDBPK_300820	3	hypothetical protein - conserved
LINF_300013900	LDBPK_300900	4	Prefoldin subunit - putative
LINF_300031500	LDBPK_302630	1	hypothetical protein - conserved
LINF_300033500	LDBPK_302830	3	chaperonin HSP60/CNP60 - putative
LINF_310007000	LDBPK_310200	3	nucleolar protein - putative
LINF_310013100	LDBPK_310770	4	Tir chaperone protein (CesT) family - putative
LINF_310016200	LDBPK_311010	1	hypothetical protein - conserved
LINF_310034100	LDBPK_312670	21	calreticulin - putative
LINF_320011800	LDBPK_320680	1	AKAP7 2'5' RNA ligase-like domain/2'-5' RNA ligase superfamily - putative
LINF_320015300	LDBPK_321020	5	Calpain family cysteine protease - putative
LINF_320017200	LDBPK_321210	5	hypothetical protein - conserved
LINF_320023200	LDBPK_321830	5	pumilio/PUF RNA binding protein 7 - putative
LINF_320028900	LDBPK_322410	3	heat shock protein Hsp20 - putative
LINF_320031600	LDBPK_322620	1	hypothetical protein - conserved
LINF_320039300	LDBPK_323380	2	mitochondrial RNA binding protein - putative
LINF_320045200	LDBPK_323950	1	Tetratricopeptide repeat - putative
LINF_330013000	LDBPK_330660	11	paraflagellar rod component - putative
LINF_330036500	LDBPK_332860	6	3-oxoacyl-acyl carrier protein synthase ii - putative
LINF_340008100	LDBPK_340320	3	ribosomal RNA-processing protein 9
LINF_340009000	LDBPK_340410	3	hypothetical protein - conserved
LINF_340016200	LDBPK_262700	5	ATP-binding cassette protein subfamily B - member 2 - putative
LINF_340028300	LDBPK_342060	11	twinfilin - putative
LINF_340031400	LDBPK_342380	1	hypothetical protein - conserved
LINF_340037000	LDBPK_342860	4	Retinal Maintenance - putative
LINF_340037200	LDBPK_342880	4	Cytochrome b5-like Heme/Steroid binding domain containing protein - putative
LINF_340048800	LDBPK_343930	3	hypothetical protein - conserved
LINF_340049000	LDBPK_343950	5	Alpha/beta hydrolase family - putative
LINF_350026200	LDBPK_352110	6	hypothetical protein - conserved
LINF_350027600	LDBPK_352280	1	hypothetical protein - conserved
LINF_350028100	LDBPK_352330	3	hypothetical protein - conserved
LINF_350032500	LDBPK_352770	4	hypothetical protein
LINF_350035000	LDBPK_353020	3	hypothetical protein - conserved
LINF_350044100	LDBPK_353910	2	nucleoside diphosphate kinase - putative
LINF_350045300	LDBPK_354030	1	4E-interacting protein - putative
LINF_350049600	LDBPK_354450	1	hypothetical protein - conserved
LINF_350049700	LDBPK_354460	1	TAX-1
LINF_350052500	LDBPK_354740	1	katanin - putative
LINF_350054900	LDBPK_354990	5	hypothetical protein - conserved
LINF_350059000	LDBPK_355310	10	hypothetical protein - conserved
LINF_360007500	LDBPK_360250	1	peptidyl-prolyl cis-trans isomerase - putative
LINF_360009100	LDBPK_360420	1	hypothetical protein - conserved
LINF_360019200	LDBPK_361400	3	zinc finger protein
LINF_360024800	LDBPK_361920	1	DEAD box RNA helicase - putative
LINF_360026100	LDBPK_362050	1	DNA mismatch repair protein MSH6 - putative
LINF_360028800	LDBPK_362300	1	NOL1/NOP2/sun family - putative
LINF_360035400	LDBPK_362890	2	acetyltransferase-like protein
LINF_360039500	LDBPK_363280	1	cyclophilin 10 - putative
LINF_360049800	LDBPK_364270	2	phosphoglycerate mutase family member 5 - putative
LINF_360054300	LDBPK_364720	4	Protein of unknown function (DUF2870) - putative
LINF_360055000	LDBPK_364790	4	PSP1 C-terminal conserved region containing protein - putative
LINF_360058800	LDBPK_365160	3	translation initiation factor 2 subunit - putative
LINF_360069100	LDBPK_366180	2	kinetoplast DNA-associated protein - putative
LINF_360071600	LDBPK_366420	3	hypothetical protein - conserved
LINF_360076200	LDBPK_366760	3	mitogen-activated protein kinase
LINF_360079900	LDBPK_367120	2	CG1104 protein-like protein

## Sheet: Table S2
Table S2. Translational machinery components: ribosomal proteins, translation factors and tRNA synthetases
Gene ID	Description		Gene ID	Description		Gene ID	Description
LINF 360015600	40S ribosomal protein S10 - putative		LINF 250006400	elongation factor - putative		LINF 220021600	alanyl-tRNA synthetase - putative
LINF 360015700	40S ribosomal protein S10 - putative		LINF 170005900	elongation factor 1-alpha		LINF 270019800	arginyl-tRNA synthetase - putative
LINF 200021000	40S ribosomal protein S11 - putative		LINF 170006000	elongation factor 1-alpha		LINF 270019800	arginyl-tRNA synthetase - putative
LINF 210024100	40S ribosomal protein S11 - putative		LINF 170006100	elongation factor 1-alpha		LINF 340028800	asparaginyl-tRNA synthetase - putative
LINF 130010600	40S ribosomal protein S12 - putative		LINF 170006200	elongation factor 1-alpha		LINF 300009700	aspartyl-tRNA synthetase - putative
LINF 190008800	40S ribosomal protein S13 - putative		LINF 170006300	elongation factor 1-alpha		LINF 120007600	cysteinyl-tRNA synthetase - putative
LINF 330041600	40S ribosomal protein S13 - putative		LINF 170006400	elongation factor 1-alpha		LINF 150022500	glutaminyl-tRNA synthetase - putative
LINF 280015200	40S ribosomal protein S14		LINF 170006500	elongation factor 1-alpha		LINF 300038100	glutamyl-tRNA synthetase - putative
LINF 300041700	40S ribosomal protein S14		LINF 170006600	elongation factor 1-alpha		LINF 360047300	glycyl tRNA synthetase - putative
LINF 220009800	40S ribosomal protein S15 - putative		LINF 170006800	elongation factor 1-alpha		LINF 300011400	histidyl-tRNA synthetase - putative
LINF 220010100	40S ribosomal protein S15 - putative		LINF 170006900	elongation factor 1-alpha		LINF 360066000	isoleucyl-tRNA synthetase - putative
LINF 110017900	40S ribosomal protein S15A - putative		LINF 170007000	elongation factor 1-alpha		LINF 130016000	leucyl-tRNA synthetase - putative
LINF 290025400	40S ribosomal protein S15A - putative		LINF 170007100	elongation factor 1-alpha		LINF 150007600	lysyl-tRNA synthetase - putative
LINF 260013700	40S ribosomal protein S16 - putative		LINF 170007200	elongation factor 1-alpha		LINF 210013900	methionyl-tRNA synthetase
LINF 260013800	40S ribosomal protein S16 - putative		LINF 340014000	elongation factor 1-beta		LINF 190015700	phenylalanyl-tRNA synthetase - putative
LINF 280032800	40S ribosomal protein S17 - putative		LINF 340014200	elongation factor 1-beta		LINF 180017600	prolyl-tRNA synthetase - putative
LINF 280032900	40S ribosomal protein S17 - putative		LINF 330023700	elongation factor 1-gamma - putative		LINF 180017700	prolyl-tRNA synthetase - putative
LINF 360015100	40S ribosomal protein S18 - putative		LINF 360006800	elongation factor 2		LINF 110005900	seryl-tRNA synthetase - putative
LINF 360015200	40S ribosomal protein S18 - putative		LINF 360006900	elongation factor 2		LINF 350019000	threonyl-tRNA synthetase - putative
LINF 340033900	40S ribosomal protein S19 protein - putative		LINF 360007000	elongation factor 2		LINF 230008300	tryptophanyl-tRNA synthetase - putative
LINF 290036400	40S ribosomal protein S19-like protein		LINF 360007100	elongation factor 2		LINF 290005500	tryptophanyl-tRNA synthetase - putative
LINF 190005400	40S ribosomal protein S2		LINF 360011200	Elongation factor G1 - mitochondrial - putative		LINF 160016900	tyrosyl or methionyl-tRNA synthetase-like protein
LINF 320009600	40S ribosomal protein S2		LINF 290012200	Elongation factor Ts - mitochondrial - putative		LINF 140020100	tyrosyl-tRNA synthetase - putative
LINF 110013300	40S ribosomal protein S21 - putative		LINF 180012600	Elongation factor Tu - mitochondrial - putative		LINF 300036900	valyl-tRNA synthetase - putative
LINF 110013400	40S ribosomal protein S21 - putative		LINF 090016000	elongation factor-1 gamma
LINF 210018200	40S ribosomal protein S23 - putative		LINF 090016050	elongation factor-1 gamma
LINF 210018300	40S ribosomal protein S23 - putative		LINF 030014900	eukaryotic initiation factor 2a - putative
LINF 360036600	40S ribosomal protein S24e		LINF 010012800	eukaryotic initiation factor 4a - putative
LINF 360036700	40S ribosomal protein S24e		LINF 010012900	eukaryotic initiation factor 4a - putative
LINF 180011200	40S ribosomal protein S27-1 - putative		LINF 250012900	eukaryotic initiation factor 5a - putative
LINF 360046400	40S ribosomal protein S27-1 - putative		LINF 250013000	eukaryotic initiation factor 5a - putative
LINF 150017600	40S ribosomal protein S3 - putative		LINF 250013100	eukaryotic initiation factor 5a - putative
LINF 330016500	40S ribosomal protein S3 - putative		LINF 360070500	eukaryotic translation initation factor 4 gamma - putative
LINF 260021300	40S ribosomal protein S33 - putative		LINF 280029900	eukaryotic translation initiation factor - putative
LINF 260021400	40S ribosomal protein S33 - putative		LINF 160006500	eukaryotic translation initiation factor 1A - putative
LINF 260021500	40S ribosomal protein S33 - putative		LINF 080010700	eukaryotic translation initiation factor 2 beta subunit - putative
LINF 350009200	40S ribosomal protein S3A - putative		LINF 340026700	eukaryotic translation initiation factor 2-alpha kinase - putative
LINF 350009300	40S ribosomal protein S3A - putative		LINF 360047700	eukaryotic translation initiation factor 3 subunit 2 - putative
LINF 130017200	40S ribosomal protein S4 - putative		LINF 300036000	eukaryotic translation initiation factor 3 subunit 7-like protein
LINF 130017300	40S ribosomal protein S4 - putative		LINF 360081900	eukaryotic translation initiation factor 3 subunit 8 - putative
LINF 110015600	40S ribosomal protein S5		LINF 360007700	eukaryotic translation initiation factor 3 subunit L - putative
LINF 110015700	40S ribosomal protein S5		LINF 160022100	eukaryotic translation initiation factor 4 gamma - putative
LINF 210027600	40S ribosomal protein S6 - putative		LINF 150005500	Eukaryotic translation initiation factor 4 gamma type 1 - putative
LINF 350025100	40S ribosomal protein S6 - putative		LINF 150021000	Eukaryotic translation initiation factor 4 gamma type 2 - putative
LINF 240026900	40S ribosomal protein S8 - putative		LINF 100017900	Eukaryotic translation initiation factor 4 gamma type 5 - putative
LINF 240027000	40S ribosomal protein S8 - putative		LINF 280032200	eukaryotic translation initiation factor 4E - putative
LINF 070012400	40S ribosomal protein S9 - putative		LINF 360011500	Eukaryotic translation initiation factor 4E type 5 - putative
LINF 360018300	40S ribosomal protein S9 - putative		LINF 340008600	eukaryotic translation initiation factor 5 - putative
LINF 360059600	40S ribosomal protein SA - putative		LINF 360014600	eukaryotic translation initiation factor 6 (eIF-6) - putative
LINF 360060700	40S ribosomal protein SA - putative		LINF 160012300	Eukaryotic translation initiation factor eIF2A - putative
LINF 150009100	60S acidic ribosomal protein - putative		LINF 270023100	eukaryotic translation initiation factor eIF-4E - putative
LINF 150009200	60S acidic ribosomal protein - putative
LINF 270020500	60S acidic ribosomal protein P0 - putative
LINF 270020600	60S acidic ribosomal protein P0 - putative
LINF 150019600	60S acidic ribosomal protein P2
LINF 300043000	60S acidic ribosomal protein P2 - putative
LINF 300043100	60S acidic ribosomal protein P2 - putative
LINF 150019500	60S acidic ribosomal protein P2GeneDB:LmjF.15.1203
LINF 140006400	60S ribosomal protein - putative
LINF 040012600	60S ribosomal protein L10 - putative
LINF 040014500	60S ribosomal protein L10 - putative
LINF 180011500	60S ribosomal protein L10a - putative
LINF 360046500	60S ribosomal protein L10a - putative
LINF 220005300	60S ribosomal protein L11 (L5 - L16)
LINF 240028300	60S ribosomal protein L12 - putative
LINF 350027100	60S ribosomal protein L12 - putative
LINF 290032300	60S ribosomal protein L13 - putative
LINF 290032400	60S ribosomal protein L13 - putative
LINF 150007100	60S ribosomal protein L13a - putative
LINF 340014400	60S ribosomal protein L13a - putative
LINF 220021400	60S ribosomal protein L14 - putative
LINF 220021800	60S ribosomal protein L14 - putative
LINF 320009400	60S ribosomal protein L17 - putative
LINF 130010500	60S ribosomal protein L18 - putative
LINF 360054400	60S ribosomal protein L18 - putative
LINF 320014400	60S ribosomal protein L18a - putative
LINF 350010700	60S ribosomal protein L18a - putative
LINF 060009600	60S ribosomal protein L19 - putative
LINF 320046200	60S ribosomal protein L2 - putative
LINF 350019200	60S ribosomal protein L2 - putative
LINF 350019300	60S ribosomal protein L2 - putative
LINF 350019400	60S ribosomal protein L2 - putative
LINF 350019500	60S ribosomal protein L2 - putative
LINF 160009700	60S ribosomal protein L21 - putative
LINF 340044000	60S ribosomal protein L21 - putative
LINF 360041100	60S ribosomal protein L22 - putative
LINF 360053500	60S ribosomal protein L22 - putative
LINF 350043300	60S ribosomal protein L23 - putative
LINF 350043400	60S ribosomal protein L23 - putative
LINF 060011300	60S ribosomal protein L23a - putative
LINF 060011400	60S ribosomal protein L23a - putative
LINF 240026700	60S ribosomal protein L26 - putative
LINF 350043000	60S ribosomal protein L27A/L29 - putative
LINF 350043200	60S ribosomal protein L27A/L29 - putative
LINF 110017300	60S ribosomal protein L28 - putative
LINF 110017500	60S ribosomal protein L28 - putative
LINF 350007500	60S ribosomal protein L30
LINF 210027000	60S ribosomal protein L32
LINF 350025500	60S ribosomal protein L32
LINF 180019400	60S ribosomal protein L34 - putative
LINF 360046300	60S ribosomal protein L34 - putative
LINF 260028800	60S ribosomal protein L35 - putative
LINF 260028900	60S ribosomal protein L35 - putative
LINF 210013000	60S ribosomal protein L36 - putative
LINF 350024100	60S ribosomal protein L36 - putative
LINF 330028300	60S ribosomal protein L37
LINF 210028000	60S ribosomal protein L37a
LINF 360025800	60S ribosomal protein L37a
LINF 130022200	60S ribosomal protein L44 - putative
LINF 330042500	60S ribosomal protein L44 - putative
LINF 350023700	60S ribosomal protein L5 - putative
LINF 350023800	60S ribosomal protein L5 - putative
LINF 350023900	60S ribosomal protein L5 - putative
LINF 330014100	60S ribosomal protein L6 - putative
LINF 260006600	60S ribosomal protein L7 - putative
LINF 260006700	60S ribosomal protein L7 - putative
LINF 070010500	60S ribosomal protein L7a - putative
LINF 070010600	60S ribosomal protein L7a - putative
LINF 210018100	60S ribosomal protein L9 - putative
LINF 300039100	60S ribosomal protein L9 - putative
LINF 350038200	60S ribosomal subunit protein L31 - putative
LINF 350038300	60S ribosomal subunit protein L31 - putative

## Sheet: Table S3
Table S3. Proteins annotated as RNA binding proteins
Gene ID	Description
LINF 070008800	ATP-dependent DEAD/H RNA helicase - putative
LINF 070008800	ATP-dependent DEAD/H RNA helicase - putative
LINF 240007200	ATP-dependent DEAD/H RNA helicase - putative
LINF 350008800	ATP-dependent DEAD-box RNA helicase - putative
LINF 150006200	ATP-dependent RNA helicase - putative
LINF 310007700	ATP-dependent RNA helicase - putative
LINF 320009100	ATP-dependent RNA helicase - putative
LINF 350036300	ATP-dependent RNA helicase - putative
LINF 360038000	ATP-dependent RNA helicase - putative
LINF 280021300	ATP-dependent RNA helicase FAL1 - putative
LINF 210024300	ATP-dependent RNA helicase SUB2 - putative
LINF 350028000	ATP-dependent RNA helicase-like protein
LINF 360024800	DEAD box RNA helicase - putative
LINF 280027400	DEAD-box ATP-dependent RNA helicase - mitochondrial
LINF 350030700	Double RNA binding domain protein 9
LINF 210011000	la RNA binding protein - putative
LINF 330034300	mitochondrial RNA binding complex 1 subunit
LINF 310012000	mitochondrial RNA binding complex 1 subunit - putative
LINF 250024100	mitochondrial RNA binding complex 1 subunit - putative
LINF 230015400	mitochondrial RNA binding protein - putative
LINF 310012100	mitochondrial RNA binding protein - putative
LINF 330020200	mitochondrial RNA binding protein - putative
LINF 320039300	mitochondrial RNA binding protein - putative
LINF 050006300	nucleolar RNA helicase II - putative
LINF 360022700	poly-zinc finger protein 2 - putative
LINF 360005400	PUF1 - putative
LINF 320023200	pumilio/PUF RNA binding protein 7 - putative
LINF 330019100	pumilio protein 6 - putative
LINF 110009600	pumillio protein 10 - putative
LINF 120008900	pumillio protein 4 - putative
LINF 250030800	pumillio protein 8 - putative
LINF 180010900	RNA binding protein - putative
LINF 320013000	RNA binding protein - putative
LINF 190007800	RNA binding protein - putative
LINF 280013700	RNA binding protein rbp16 - putative
LINF 070016300	RNA binding protein-like protein
LINF 360022500	universal minicircle sequence binding protein
LINF 360022800	universal minicircle sequence binding protein - putative
LINF 360022400	universal minicircle sequence binding protein - putative

## Sheet: Table S4
Table S4. Identified proteins belonging to the pentose phosphate pathway
Gene_ID	Description
LINF_360018400	fructose-1 -6-bisphosphate aldolase
LINF_120010600	glucose-6-phosphate isomerase
LINF_360063600	phosphoribosylpyrophosphate synthetase - putative
LINF_210012000	phosphoglucomutase - putative
LINF_080016200	phosphoribosylpyrophosphate synthetase
LINF_040016700	fructose-1 -6-bisphosphatase
LINF_330028000	phosphoribosylpyrophosphate synthetase - putative
LINF_290032900	ATP-dependent phosphofructokinase
LINF_060016500	deoxyribose-phosphate aldolase - putative
LINF_240026800	transketolase
LINF_350038800	6-phosphogluconate dehydrogenase - decarboxylating - putative
LINF_080010200	ribose-phosphate pyrophosphokinase - putative
LINF_340045400	phosphomannomutase-like protein
LINF_270009300	ribokinase - putative
LINF_340005700	glucose-6-phosphate 1-dehydrogenase - putative
LINF_160013000	transaldolase - putative
LINF_280026200	ribose 5-phosphate isomerase - putative
LINF_330024000	ribulose-5-phosphate 3-epimerase - putative

## Sheet: Table S5
Table S5. Proteins of the mithocondrial electron transport chain
Gene_ID	Description
LINF_080007900	iron superoxide dismutase
LINF_120011900	cytochrome c oxidase subunit iv
LINF_150018000	succinate dehydrogenase, putative
LINF_160019000	cytochrome c, putative
LINF_210026900	COX6 cytochrome C oxidase subunit VI, putative
LINF_250017400	cytochrome c oxidase VII, putative
LINF_260022200	cytochrome c oxidase subunit V, putative
LINF_310023000	cytochrome c oxidase VIII (COX VIII), putative
LINF_310033900	ubiquinol-cytochrome-c reductase-like protein
LINF_350016600	NADH-dependent fumarate reductase, putative
LINF_350020400	reiske iron-sulfur protein precursor, putative
LINF_360063500	NADH dehydrogenase, putative
LINF_250006300	electron transfer flavoprotein - putative
LINF_070011500	electron transfer flavoprotein-ubiquinone oxidoreductase - putative
LINF_280017100	electron-transfer-flavoprotein - alpha polypeptide - putative
LINF_210023000	cytochrome b5 domain-containing protein
LINF_310018200	Cytochrome b5-like Heme/Steroid binding domain containing protein
LINF_340037200	Heme/Steroid binding domain containing protein
LINF_090022500	cytochrome b5-like protein - putative

## Sheet: Table S6
Table S6. Identified proteins belonging to the proteosome
Gene ID	Description
LINF 220011600	proteasome regulatory ATPase subunit 5 - putative
LINF 120007200	proteasome regulatory ATPase subunittcc1l8.3 - putative
LINF 290006100	proteasome regulatory non-ATPase subunit - putative
LINF 190016600	proteasome regulatory non-ATP-ase subunit 9 - putative
LINF 320009000	19S proteasome non-atpase subunit 8
LINF 280006000	proteasome beta 3 subunit - putative
LINF 220011100	proteasome regulatory ATPase subunit 1 - putative
LINF 110007300	proteasome alpha 7 subunit - putative
LINF 350043800	proteasome beta 2 subunit - putative
LINF 320017700	proteasome regulatory non-ATP-ase subunit - putative
LINF 340012100	proteasome regulatory non-ATPase subunit 11 - putative
LINF 270006800	proteasome alpha 7 subunit - putative
LINF 270021500	proteasome regulatory non-ATP-ase subunit 3 - putative
LINF 360022300	proteasome subunit alpha type-1 - putative
LINF 060006500	20S proteasome beta 6 subunit - putative
LINF 130015900	proteasome regulatory ATPase subunit 2 - putative
LINF 360022900	proteasome subunit beta type-5 - putative
LINF 210028100	proteasome subunit alpha type-5 - putative
LINF 140008100	proteasome alpha 3 subunit - putative
LINF 350054100	proteasome alpha 1 subunit - putative
LINF 360008400	20S proteasome subunit
LINF 030010200	26S protease regulatory subunit - putative
LINF 360052900	19S proteasome regulatory subunit
LINF 120005200	proteasome beta-1 subunit - putative
LINF 210013400	proteasome regulatory non-ATP-ase subunit 5 - putative
LINF 210026800	proteasome alpha 2 subunit - putative
LINF 020008700	proteasome regulatory non-ATPase subunit 6 - putative
LINF 320035300	proteasome regulatory non-ATP-ase subunit - putative
LINF 280023600	proteasome regulatory non-ATP-ase subunit 2 - putative

## Sheet: Table S7
Table S7. Identified proteins in the categories of chaperones and heat shock proteins
Gene ID	Unique peptides	Description
LINF_020012400	23	HSP78
LINF_040014400	2	DnaJ domain-containing protein J27
LINF_130022100	27	chaperonin TCP20
LINF_140019700	5	DnaJ domain-containing protein J53
LINF_180019100	72	HSP110
LINF_190005600	5	DnaJ domain-containing protein J15
LINF_200016400	2	DnaJ domain-containing protein J16
LINF_210010300	8	DnaJ domain-containing protein J3
LINF_220005800	7	DnaJ domain-containing protein J66
LINF_240010000	5	DnaJ domain-containing protein J8
LINF_250017100	7	DnaJ domain-containing protein J46
LINF_260017400	42	HSP70.4
LINF_270032200	31	DnaJ domain-containing protein J2
LINF_280017800	51	GRP78/BiP
LINF_280035400	92	hsp70
LINF_290012700	40	GRP94
LINF_290018300	19	Hsp70-related protein 4|HRP4
LINF_290018600	11	HSP100
LINF_290032200	3	HSP20
LINF_300030100	73	mtHSP70
LINF_300030200	73	mtHSP70
LINF_300030600	73	mtHSP70
LINF_300033500	3	chaperonin CNP60.4
LINF_310010500	2	DnaJ domain-containing protein J41
LINF_310039900	1	DnaJ domain-containing protein J44
LINF_320015700	28	T-complex protein (TCP)
LINF_320024300	2	chaperonin cpn60.1
LINF_320025300	5	DnaJ domain-containing protein J7
LINF_320028900	3	HSP20
LINF_320040200	32	chaperonin alpha subunit
LINF_320040500	5	DnaJ domain-containing protein J45
LINF_330009000	22	HSP83/90
LINF_330009100	22	HSP83/90
LINF_330009200	22	HSP83/90
LINF_330009300	22	HSP83/90
LINF_330009400	22	HSP83/90
LINF_330009500	22	HSP83/90
LINF_330009800	22	HSP83/90
LINF_330009900	22	HSP83/90
LINF_330010000	22	HSP83/90
LINF_330016300	3	DnaJ domain-containing protein J54
LINF_330033000	48	TRAP-1|HSP75
LINF_350035100	7	DnaJ domain-containing protein J50
LINF_350052100	9	DnaJ domain-containing protein J34
LINF_350052900	12	GRP170
LINF_360027100	19	chaperonin cpn60.2
LINF_360027200	26	chaperonin cpn60.3
LINF_360028100	2	DnaJ domain-containing protein J34
LINF_360072700	12	DnaJ domain-containing protein J66
LINF_260011400	9	CPN10

## Sheet: Table S8
Table S8. Putative Glycosomal proteins according to previous studies (Colasante et al 2013; Jamdhade et al 2015)
Colasante, C., Voncken, F., Manful, T., Ruppert, T., Tielens, A.G., van Hellemond, J.J., and Clayton, C. (2013). Proteins and lipids of glycosomal membranes from Leishmania tarentolae and Trypanosoma brucei. F1000Res 2, 27.
Jamdhade, M.D., Pawar, H., Chavan, S., Sathe, G., Umasankar, P.K., Mahale, K.N., Dixit, T., Madugundu, A.K., Prasad, T.S., Gowda, H., et al. (2015). Comprehensive proteomics analysis of glycosomes from Leishmania donovani. OMICS 19, 157–170.
Locus ID	Description
LINF_010005500	hypothetical protein - conserved
LINF_010007600	thioredoxin - putative
LINF_010009200	ribosomal protein S7 - putative
LINF_010009700	hypothetical protein, conserved
LINF_010009800	long-chain-fatty-acid-CoA ligase - putative
LINF_010009900	beta eliminating lyase -putative
LINF_010010000	long-chain-fatty-acid-CoA ligase - putative
LINF_010010500	hypothetical protein - conserved
LINF_010010800	tricarboxylate carrier - putative
LINF_010011300	hypothetical protein - conserved
LINF_010012800	eukaryotic initiation factor 4a - putative
LINF_020006700	phosphoglycan beta 1 -3 galactosyltransferase
LINF_020006800	phosphoglycan beta 1 -3 galactosyltransferase
LINF_020006900	phosphoglycan beta 1 -3 galactosyltransferase
LINF_020007000	phosphoglycan beta 1 -3 galactosyltransferase
LINF_020007100	phosphoglycan beta 1 -3 galactosyltransferase
LINF_020008600	casein kinase II - alpha chain - putative
LINF_020008700	proteasome regulatory non-ATPase subunit 6 - putative
LINF_020009700	voltage-dependent anion-selective channel - putative
LINF_020009800	voltage-dependent anion-selective channel - putative
LINF_020010800	hypothetical protein - conserved
LINF_020012400	Heat shock protein 100 kDa
LINF_030005200	D-3-phosphoglycerate dehydrogenase-like protein
LINF_030005300	2-aminoethylphosphonate:pyruvateaminotransferase-like protein
LINF_030006100	acetyltransferase - putative
LINF_030006700	U2 splicing auxiliary factor - putative
LINF_030006800	delta-1-pyrroline-5-carboxylate dehydrogenase - putative
LINF_030007000	hypothetical protein - conserved
LINF_030007100	long-chain-fatty-acid-CoA ligase - putative
LINF_030007300	ribosomal protein L38 - putative
LINF_030010200	26S protease regulatory subunit - putative
LINF_030011200	hypothetical protein - conserved
LINF_030011900	DEAD/DEAH box helicase/Type III restriction enzyme - res subunit - putative
LINF_030014700	hypothetical protein - conserved
LINF_030014900	eukaryotic initiation factor 2a - putative
LINF_040005000	calcium-translocating P-type ATPase
LINF_040005200	cAMP-specific phosphodiesterase - putative
LINF_040005600	hypothetical protein - conserved
LINF_040007500	GRAM domain containing protein - putative
LINF_040008000	Alcohol dehydrogenase GroES-like domain containing protein - putative
LINF_040009200	Tetratricopeptide repeat - putative
LINF_040009500	cysteine peptidase - Clan CA - family C2 - putative
LINF_040012000	Axonemal dynein light chain - putative
LINF_040012600	60S ribosomal protein L10 - putative
LINF_040014400	chaperone protein DNAj - putative
LINF_040014600	adenylate kinase - putative
LINF_040016700	fructose-1 -6-bisphosphatase
LINF_040016900	RNA-binding protein - putative
LINF_040017600	actin
LINF_050005500	major vault protein - putative
LINF_050005600	dynein light chain - putative
LINF_050005900	phosphoprotein phosphatase - putative
LINF_050006400	Leucine Rich repeat-containing protein
LINF_050008400	hypothetical protein - conserved
LINF_050008800	microtubule-associated protein - putative
LINF_050009500	hypothetical protein - conserved
LINF_050010000	ATP synthase F1 - alpha subunit - putative
LINF_050010300	Nuclear receptor binding factor-like protein
LINF_050011500	Ankyrin repeats-containing protein
LINF_050013500	methylthioadenosine phosphorylase - putative
LINF_050013700	zinc-finger of a C2HC-type - putative
LINF_050014100	CPSF A subunit region containing protein - putative
LINF_050014800	metallo-peptidase - Clan M- - Family M49
LINF_050015600	hypothetical protein - conserved
LINF_050015800	stomatin-like protein
LINF_050016000	Legume-like lectin family - putative
LINF_050016700	V-type proton ATPase subunit D - putative
LINF_050017300	prefoldin subunit - putative
LINF_050017500	surface antigen-like protein
LINF_060005200	WD domain - G-beta repeat - putative
LINF_060006500	20S proteasome beta 6 subunit - putative
LINF_060007900	5'-3' exoribonuclease A - putative
LINF_060008800	NAD(P)-dependent steroid dehydrogenase protein - putative
LINF_060009000	glutamine synthetase - putative
LINF_060009900	hypothetical protein - conserved
LINF_060012100	lanosterol synthase - putative
LINF_060013000	serine-threonine dehydratase - putative
LINF_060014300	dihydrofolate reductase-thymidylate synthase
LINF_060014900	hypothetical protein - conserved
LINF_060015300	cell cycle associated protein MOB1 - putative
LINF_060016800	hypothetical protein - conserved
LINF_060019000	protoporphyrinogen oxidase-like protein
LINF_070005600	cytochrome c1 - heme protein - mitochondrial - putative
LINF_070007100	protein phosphatase 2A - regulatory subunit B - putative
LINF_070007900	acetylornithine deacetylase-like protein
LINF_070008100	Uncharacterised protein family (UPF0172) - putative
LINF_070008800	ATP-dependent DEAD/H RNA helicase - putative
LINF_070010500	60S ribosomal protein L7a - putative
LINF_070011500	electron transfer flavoprotein-ubiquinone oxidoreductase - putative
LINF_070011900	vacuolar-type Ca2+-ATPase - putative
LINF_070012000	hypothetical protein - conserved
LINF_070012100	vacuolar-type Ca2+-ATPase - putative
LINF_070012400	40S ribosomal protein S9 - putative
LINF_070013900	flavoprotein subunit-like protein
LINF_070014900	splicing factor ptsr1-like protein
LINF_070015600	Radial spokehead-like protein - putative
LINF_080005200	Qc-SNARE protein - putative
LINF_080006100	hypothetical protein - conserved
LINF_080007000	inositol phosphosphingolipid phospholipase C-Like
LINF_080008200	mitochondrial associated ribonuclease - putative
LINF_080009200	WD domain - G-beta repeat - putative
LINF_080009300	hypothetical protein - conserved
LINF_080010700	eukaryotic translation initiation factor 2 beta subunit - putative
LINF_080010800	hypothetical protein - conserved
LINF_080013300	mitochondrial DNA polymerase beta
LINF_080015200	cysteine peptidase B (CPB)
LINF_080015300	cysteine peptidase B (CPB)
LINF_080015400	cysteine peptidase B (CPB)
LINF_080015500	cysteine peptidase B (CPB)
LINF_080015800	hypothetical protein
LINF_080016000	stress-induced protein sti1
LINF_080017300	hypothetical protein - conserved
LINF_080017500	Amidinotransferase - putative
LINF_090005200	hypothetical protein - conserved
LINF_090006100	calmodulin-like protein containing EF hand domain
LINF_090007900	ATP-dependent protease ATPase subunit HslU
LINF_090011100	hypothetical protein - conserved
LINF_090013900	oligopeptidase b
LINF_090014600	Uncharacterised protein family (UPF0160) - putative
LINF_090015400	calmodulin - putative
LINF_090015500	calmodulin - putative
LINF_090015700	translation-associated element 2 - putative
LINF_090016000	elongation factor-1 gamma
LINF_090016900	hypothetical protein - conserved
LINF_090017900	MSP (Major sperm protein) domain containing protein - putative
LINF_090018100	translation initiation factor EIF-2B gamma subunit - putative
LINF_090018500	mitochondrial RNA binding protein 2
LINF_090022500	cytochrome b5-like protein - putative
LINF_090022900	Leucine Rich repeat - putative
LINF_100005600	ribosomal protein l35a - putative
LINF_100007300	Nucleolar protein 56 - putative
LINF_100008300	isocitrate dehydrogenase [NADP] - mitochondrial precursor - putative
LINF_100011800	glycerol-3-phosphate dehydrogenase [NAD+] - glycosomal
LINF_100015200	nuclear transport factor 2 - putative
LINF_100015800	small GTP-binding protein Rab11 - putative
LINF_100018800	Tumour suppressor - Mitostatin - putative
LINF_100018900	Ras-related protein RabX1 - putative
LINF_100019200	flagellar protofilament ribbon protein-like protein
LINF_100020300	Protein of unknown function (DUF1861) - putative
LINF_100020400	Protein of unknown function (DUF1861) - putative
LINF_100020700	Protein of unknown function (DUF1861) - putative
LINF_110005900	seryl-tRNA synthetase - putative
LINF_110007000	acidocalcisomal pyrophosphatase
LINF_110007300	proteasome alpha 7 subunit - putative
LINF_110007500	hypothetical protein - conserved
LINF_110008400	14-3-3 protein 2 - putative
LINF_110009600	pumillio protein 10 - putative
LINF_110011600	3-methylcrotonoyl-CoA carboxylase beta subunit - putative
LINF_110012000	aminopeptidase - putative
LINF_110013700	hypothetical protein - conserved
LINF_110015600	40S ribosomal protein S5
LINF_110015700	40S ribosomal protein S5
LINF_110016000	pyruvate phosphate dikinase - putative
LINF_110016300	hypothetical protein - conserved
LINF_110017200	sterol 14-alpha-demethylase - putative
LINF_110017300	60S ribosomal protein L28 - putative
LINF_110017600	protein transport protein SEC31 - putative
LINF_110017700	eukaryotic release factor 3 - putative
LINF_110017900	40S ribosomal protein S15A - putative
LINF_120005200	proteasome beta-1 subunit - putative
LINF_120005300	Mitochondrial SSU ribosomal protein 29 - putative
LINF_120005700	hypothetical protein - conserved
LINF_120007200	proteasome regulatory ATPase subunit 3
LINF_120007600	cysteinyl-tRNA synthetase - putative
LINF_120009100	3'-nucleotidase/nuclease - putative
LINF_120010500	vacuolar ATP synthase subunit - putative
LINF_120010600	glucose-6-phosphate isomerase
LINF_120011900	cytochrome oxidase subunit IV - putative
LINF_120015300	hypothetical protein - conserved
LINF_130005800	carboxypeptidase - putative
LINF_130006500	protein kinase A regulatory subunit
LINF_130007700	alpha tubulin
LINF_130009500	hypothetical protein - conserved
LINF_130010500	60S ribosomal protein L18 - putative
LINF_130010600	40S ribosomal protein S12 - putative
LINF_130011600	mannose-specific lectin - putative
LINF_130013600	mitochondrial processing peptidase alpha subunit - putative
LINF_130013700	hypothetical protein - conserved
LINF_130014700	AMP deaminase - putative
LINF_130014900	hypothetical protein - conserved
LINF_130015500	Dpy-30 motif containing protein - putative
LINF_130015600	NADH-cytochrome b5 reductase - putative
LINF_130015900	proteasome regulatory ATPase subunit 2 - putative
LINF_130016000	leucyl-tRNA synthetase - putative
LINF_130016100	hypothetical protein - conserved
LINF_130016300	Uncharacterised ACR - YagE family COG1723 - putative
LINF_130016900	adenylosuccinate synthetase - putative
LINF_130017200	40S ribosomal protein S4 - putative
LINF_130018800	hypothetical protein - conserved
LINF_130021300	ubiquitin-conjugating enzyme - putative
LINF_130021400	T-complex protein 10 C-terminus - putative
LINF_130021600	Kinesin-13 5 - putative
LINF_130021700	squalene monooxygenase-like protein
LINF_130022000	dynein heavy chain - putative
LINF_130022100	chaperonin TCP20 - putative
LINF_130022200	60S ribosomal protein L44 - putative
LINF_130022300	pyrroline-5-carboxylate reductase
LINF_140006800	AhpC/TSA family/Thioredoxin-like - putative
LINF_140007100	PX domain containing protein - putative
LINF_140008100	proteasome alpha 3 subunit - putative
LINF_140012200	fatty acid elongase - putative
LINF_140012300	fatty acid elongase - putative
LINF_140014400	calpain-like cysteine peptidase - putative
LINF_140015800	hypothetical protein - conserved
LINF_140018000	enolase
LINF_140019100	ubiquitin/ribosomal protein S27a - putative
LINF_140019600	serine hydroxymethyltransferase (SHMT-L)
LINF_140019700	DnaJ domain containing protein - putative
LINF_140020000	inositol-3-phosphate synthase
LINF_140020900	hypothetical protein - conserved
LINF_150005400	cytochrome-b5 reductase - putative
LINF_150007100	60S ribosomal protein L13a - putative
LINF_150007600	lysyl-tRNA synthetase - putative
LINF_150008100	ribonucleoprotein p18 - mitochondrial precursor - putative
LINF_150009500	hypothetical protein - conserved
LINF_150012700	hypothetical protein - conserved
LINF_150013200	hypothetical protein - conserved
LINF_150015700	hypothetical protein - conserved
LINF_150016000	Peroxisomal membrane protein (Pex16) - putative
LINF_150017400	calmodulin-like protein
LINF_150017600	40S ribosomal protein S3 - putative
LINF_150018000	succinate dehydrogenase - putative
LINF_150018300	glutamate dehydrogenase
LINF_150019300	Cyclic nucleotide-binding domain containing protein - putative
LINF_150019500	60S acidic ribosomal protein P2
LINF_150019600	60S acidic ribosomal protein P2
LINF_150020300	E2-like ubiquitin-conjugation enzyme - putative
LINF_150020800	ubiquitin hydrolase - putative
LINF_150021200	hypothetical protein - conserved
LINF_150021500	Rab-GTPase-TBC domain containing protein - putative
LINF_150022100	hypothetical protein - conserved
LINF_150022500	glutaminyl-tRNA synthetase - putative
LINF_150022600	proliferative cell nuclear antigen (PCNA) - putative
LINF_150022800	ribosomal protein S6 - putative
LINF_150022900	cAMP specific phosphodiesterase - putative
LINF_160005800	hypothetical protein - conserved
LINF_160006500	eukaryotic translation initiation factor 1A - putative
LINF_160007400	protein tyrosine phosphatase-like protein
LINF_160007600	protein tyrosine phosphatase-likie protein
LINF_160010300	hypothetical protein - conserved
LINF_160010700	orotidine-5-phosphate decarboxylase/orotate phosphoribosyltransferase - putative
LINF_160011200	carbamoyl-phosphate synthase - putative
LINF_160012200	apurinic/apyrimidinic endonuclease-redox protein
LINF_160013000	transaldolase - putative
LINF_160015100	sucrose-phosphate synthase-like protein
LINF_160015300	hypothetical protein - conserved
LINF_160015600	Protein of unknown function (DUF3184) - putative
LINF_160015700	Protein of unknown function (DUF3184) - putative
LINF_160015800	Protein of unknown function (DUF3184) - putative
LINF_160015900	Protein of unknown function (DUF3184) - putative
LINF_160017600	coatomer delta subunit-like protein
LINF_160018900	cytochrome c - putative
LINF_160019400	Amidase - putative
LINF_160019600	ADP-ribosylation factor-like - putative
LINF_160020100	hypothetical protein - conserved
LINF_160020200	paraflagellar rod protein 1D - putative
LINF_160021200	hypothetical protein - conserved
LINF_160021400	endoplasmic reticulum oxidoreductin - putative
LINF_160022200	prohibitin
LINF_170005000	hypothetical protein - conserved
LINF_170005800	ADP-ribosylation factor-like protein 1
LINF_170005900	elongation factor 1-alpha
LINF_170008100	Tetratricopeptide repeat - putative
LINF_170008800	cystathionine beta-synthase
LINF_170012700	Acyl CoA binding protein - putative
LINF_170013800	VID27 cytoplasmic protein - putative
LINF_170014800	guanosine monophosphate reductase
LINF_170015800	META domain containing protein
LINF_170017300	Glycosyltransferase (GlcNAc) - putative
LINF_170020100	hypothetical protein - conserved
LINF_170020200	translation initiation factor - putative
LINF_180007700	glycogen synthase kinase 3 - putative
LINF_180009500	serine carboxypeptidase (CBP1) - putative
LINF_180010100	aconitase - putative
LINF_180010500	hypothetical protein - conserved
LINF_180010600	vacuolar ATP synthase subunit c - putative
LINF_180010800	peroxisomal enoyl-coa hydratase - putative
LINF_180011200	40S ribosomal protein S27-1 - putative
LINF_180011400	ATP-dependent zinc metallopeptidase - putative
LINF_180011500	60S ribosomal protein L10a - putative
LINF_180012100	citrate synthase - putative
LINF_180012200	citrate synthase - putative
LINF_180013200	Ribosomal protein S8 - putative
LINF_180014200	rab7 GTP binding protein - putative
LINF_180015800	5-oxoprolinase - putative
LINF_180016200	protein kinase A catalytic subunit
LINF_180016700	Ras-related protein Rab5A - putative
LINF_180017000	Zinc finger - C3HC4 type (RING finger) containing protein - putative
LINF_180019100	heat shock protein 110 - putative
LINF_180019200	pyruvate dehydrogenase E1 component alpha subunit - putative
LINF_180019400	60S ribosomal protein L34 - putative
LINF_180020600	P-type H+-ATPase - putative
LINF_190005200	histone H2B
LINF_190005400	40S ribosomal protein S2
LINF_190005700	hypothetical protein - conserved
LINF_190006300	mitogen-activated protein kinase kinase kinase - putative
LINF_190006400	metallo-peptidase - Clan MG - Family M24
LINF_190006700	Multiprotein-bridging factor 1 - putative
LINF_190006800	ADP- ATP carrier protein 1 - mitochondrial precursor - putative
LINF_190007400	C-terminal motor kinesin - putative
LINF_190008100	intraflagellar transport protein 52 - putative
LINF_190008200	intraflagellar transport protein 80 - putative
LINF_190008800	40S ribosomal protein S13 - putative
LINF_190011400	hypothetical protein - conserved
LINF_190011500	DNA-directed RNA polymerases I and III subunit RPAC1 - putative
LINF_190012000	glycosomal malate dehydrogenase
LINF_190015100	4-coumarate:coa ligase-like protein
LINF_190016600	proteasome regulatory non-ATP-ase subunit 9 - putative
LINF_190017000	hypothetical protein - conserved
LINF_190017700	hypothetical protein - conserved
LINF_190017900	peroxin 12 - putative
LINF_190018300	SPFH domain / Band 7 family - putative
LINF_190020600	cysteine peptidase A (CPA)
LINF_190021700	FK506-binding protein (FKBP)-type peptidyl-prolyl isomerase - putative
LINF_190022000	inosine-5'-monophosphate dehydrogenase
LINF_200006000	phosphoglycerate kinase C - glycosomal
LINF_200007400	transmembrane protein - putative
LINF_200012200	hypothetical protein - conserved
LINF_200013000	vesicular-fusion protein nsf - putative
LINF_200017300	calpain-like cysteine peptidase - Clan CA - family C2
LINF_200017400	Domain of unknown function (DUF1935) - putative
LINF_200018000	small myristoylated protein 4 - putative
LINF_200018100	Nucleosome assembly protein (NAP) - putative
LINF_200018300	small myristoylated protein-1
LINF_200018700	coatomer beta subunit - putative
LINF_200019300	paralyzed flagella protein 16
LINF_200021400	SNAP protein - putative
LINF_200022000	amidohydrolase - putative
LINF_210005500	hypothetical protein - conserved
LINF_210007800	hexokinase - putative
LINF_210008800	mitochondrial processing peptidase alpha subunit - putative
LINF_210009200	Protein of unknown function (DUF667) - putative
LINF_210009700	hypothetical protein - conserved
LINF_210010300	DnaJ protein - putative
LINF_210011000	la RNA binding protein - putative
LINF_210011100	dihydrolipoamide acetyltransferase precursorlike protein
LINF_210011200	Qc-SNARE protein - putative
LINF_210012000	phosphoglucomutase - putative
LINF_210012700	ATP-binding cassette protein subfamily E - member 1 - putative
LINF_210013000	60S ribosomal protein L36 - putative
LINF_210013400	proteasome regulatory non-ATP-ase subunit 5 - putative
LINF_210013800	CCR4-NOT transcription complex subunit 1
LINF_210013900	methionyl-tRNA synthetase
LINF_210014100	Temperature dependent protein affecting M2 dsRNA replication - putative
LINF_210015000	xanthine phosphoribosyltransferase
LINF_210016700	histone H2A - putative
LINF_210016800	histone H2A - putative
LINF_210017400	intraflagellar transport protein 172 - putative
LINF_210018100	60S ribosomal protein L9 - putative
LINF_210018400	cell division protein kinase 2
LINF_210018500	T-complex protein 1 - delta subunit - putative
LINF_210020600	adenylate kinase - putative
LINF_210021000	vesicle-associated membrane protein - putative
LINF_210021600	ATP synthase - putative
LINF_210022900	2-oxoisovalerate dehydrogenase alpha subunit - putative
LINF_210024300	ATP-dependent RNA helicase SUB2 - putative
LINF_210024400	hypothetical protein - conserved
LINF_210024700	choline dehydrogenase - like protein
LINF_210025900	mitochondrial RNA binding complex 1 subunit - putative
LINF_210026800	proteasome alpha 2 subunit - putative
LINF_210026900	cytochrome c oxidase subunit VI - putative
LINF_210027000	60S ribosomal protein L32
LINF_210027400	centromere/microtubule binding protein cbf5 - putative
LINF_210027500	ATP synthase F1 subunit gamma protein - putative
LINF_210028000	60S ribosomal protein L37a
LINF_210028100	proteasome subunit alpha type-5 - putative
LINF_220006800	hypothetical protein - conserved
LINF_220008000	hypothetical protein - conserved
LINF_220011100	proteasome regulatory ATPase subunit 1 - putative
LINF_220011600	proteasome regulatory ATPase subunit 5 - putative
LINF_220013600	NADH-cytochrome b5 reductase - putative
LINF_220013700	NADH-cytochrome b5 reductase - putative
LINF_220015000	hypothetical protein - conserved
LINF_220015400	mitochondrial chaperone - putative
LINF_220015900	hypothetical protein - conserved
LINF_220016600	small nuclear ribonucleoprotein - putative
LINF_220017400	adaptor complex AP-1 medium subunit - putative
LINF_220019800	intraflagellar transport protein-like protein
LINF_220020200	centrin-4 - putative
LINF_220020700	i/6 autoantigen-like protein
LINF_220021400	60S ribosomal protein L14 - putative
LINF_230005100	hypothetical protein - conserved
LINF_230005300	beta propeller protein - putative
LINF_230005400	peroxidoxin
LINF_230005500	cyclophilin 11 - putative
LINF_230005800	hypothetical protein - conserved
LINF_230006100	GDP-mannose pyrophosphorylase
LINF_230007100	endoribonuclease L-PSP (pb5) - putative
LINF_230007900	argininosuccinate synthase - putative
LINF_230008700	(H+)-ATPase G subunit - putative
LINF_230009000	NADP-dependent alcohol dehydrogenase - putative
LINF_230009100	cytochrome c oxidase subunit 10 - putative
LINF_230009200	ATP-binding cassette protein subfamily G - member 5
LINF_230011000	hypothetical protein - conserved
LINF_230013100	ubiquitin-activating enzyme E1 - putative
LINF_230013200	kinesin - putative
LINF_230013300	MYCBP-associated protein family - putative
LINF_230013800	UTP7
LINF_230014100	hypothetical protein - conserved
LINF_230014600	3-ketoacyl-CoA thiolase - putative
LINF_230015400	mitochondrial RNA binding protein - putative
LINF_230016100	Na/H antiporter-like protein
LINF_230018100	hypothetical protein - conserved
LINF_230020500	coronin - putative
LINF_230020600	hypothetical protein - conserved
LINF_230021100	T-complex protein 1 - gamma subunit - putative
LINF_230023400	2Fe-2S iron-sulfur cluster binding domain containing protein - putative
LINF_230023800	Inositol hexakisphosphate - putative
LINF_230025100	Tumour suppressor - Mitostatin - putative
LINF_230025500	alanine racemase - putative
LINF_230026500	Nucleoside 2-deoxyribosyltransferase - putative
LINF_240005200	Ribosomal protein L22p/L17e - putative
LINF_240005800	Calmodulin-binding - putative
LINF_240006000	guanine nucleotide-binding beta subunit-like protein
LINF_240006100	ankyrin/TPR repeat protein
LINF_240006200	glycosomal membrane like protein
LINF_240006300	hypothetical protein - conserved
LINF_240007500	Dynein intermediate chain 1 - axonemal
LINF_240007900	fumarate hydratase - putative
LINF_240008500	aspartate aminotransferase - putative
LINF_240009000	ubiquitin carboxyl-terminal hydrolase - putative
LINF_240010000	DNAJ domain protein - putative
LINF_240011400	Kinesin-13 3 - putative
LINF_240012300	signal recognition particle - putative
LINF_240013500	hypothetical protein
LINF_240013700	triosephosphate isomerase
LINF_240014600	Archaic Translocase of outer membrane 14 kDa subunit - putative
LINF_240021800	Succinate dehydrogenase [ubiquinone] flavoprotein subunit - mitochondrial
LINF_240021900	NAD dependent epimerase/dehydratase family/Male sterility protein - putative
LINF_240023800	fatty acid transporter protein-like protein
LINF_240024500	hypothetical protein - conserved
LINF_240026000	STOP axonemal protein - putative
LINF_240026500	3-oxoacyl-(acyl-carrier protein) reductase - putative
LINF_240026700	60S ribosomal protein L26 - putative
LINF_240026800	transketolase
LINF_240026900	40S ribosomal protein S8 - putative
LINF_250005800	poly(A)-binding protein 3
LINF_250006300	electron transfer flavoprotein - putative
LINF_250010200	RNA-binding protein - putative - UPB1
LINF_250010600	Scd6-like Sm domain containing protein - putative
LINF_250011100	hypothetical protein - conserved
LINF_250012700	hypothetical protein - conserved
LINF_250012900	eukaryotic initiation factor 5a - putative
LINF_250013000	eukaryotic initiation factor 5a - putative
LINF_250013300	protein phosphatase - putative
LINF_250014700	hypothetical protein - conserved
LINF_250014900	cyclophilin type peptidyl-prolyl cis-trans isomerase
LINF_250017300	aldehyde dehydrogenase - mitochondrial precursor
LINF_250017400	cytochrome c oxidase VII - putative
LINF_250017900	ATP synthase subunit beta - mitochondrial - putative
LINF_250018100	ribosomal protein S25
LINF_250020400	GTP-binding protein - putative
LINF_250022600	hypothetical protein - conserved
LINF_250022700	hypothetical protein - conserved
LINF_250023200	hypothetical protein - conserved
LINF_250023800	pyruvate dehydrogenase E1 beta subunit - putative
LINF_250024400	enoyl-CoA reductase - putative
LINF_250024700	hypothetical protein - conserved
LINF_250025000	hypothetical protein - conserved
LINF_250025200	CCR4-NOT transcription complex subunit
LINF_250027000	2 -4-dihydroxyhept-2-ene-1 -7-dioic acid aldolase - putative
LINF_250027800	hypothetical protein - conserved
LINF_250028300	succinyl-CoA synthetase alpha subunit - putative
LINF_250028700	Ubiquitin-2 like Rad60 SUMO-like - putative
LINF_250029100	Parkin co-regulated protein - putative
LINF_250030600	AGC family serine/threonine kinase - putative
LINF_250031400	hypothetical protein - conserved
LINF_260006600	60S ribosomal protein L7 - putative
LINF_260008200	C-1-tetrahydrofolate synthase - cytoplasmic - putative
LINF_260011200	10 kDa heat shock protein - putative
LINF_260013100	type II (glutathione peroxidase-like) tryparedoxin peroxidase
LINF_260014600	NMD3 family - putative
LINF_260015400	hypothetical protein - conserved
LINF_260016100	TROVE domain/WD domain - G-beta repeat - putative
LINF_260017400	heat shock 70-related protein 1 - mitochondrial precursor - putative
LINF_260018100	hypothetical protein - conserved
LINF_260020500	trifunctional enzyme alpha subunit - mitochondrial precursor-like protein
LINF_260021100	proline oxidase - mitochondrial precursor-like protein
LINF_260021300	40S ribosomal protein S33 - putative
LINF_260021400	40S ribosomal protein S33 - putative
LINF_260022200	cytochrome c oxidase subunit V - putative
LINF_260023800	engulfment and cell motility domain 2 - putative
LINF_260024800	microtubule-associated protein - putative
LINF_260024900	hypothetical protein - conserved
LINF_260025300	Methyltransferase domain containing protein - putative
LINF_260027900	hypothetical protein - conserved
LINF_260029100	SLY1 protein - putative
LINF_260029600	hypothetical protein - conserved
LINF_270005800	cytochrome p450-like protein
LINF_270006800	proteasome alpha 7 subunit - putative
LINF_270008100	methylmalonyl-coenzyme a mutase - putative
LINF_270008900	Nuclear pore complex protein 158
LINF_270009300	ribokinase - putative
LINF_270010000	calpain-like cysteine peptidase - putative
LINF_270011100	calpain-like cysteine peptidase - putative
LINF_270013800	ras-related protein RAB1A - putative
LINF_270015100	2-oxoglutarate dehydrogenase subunit - putative
LINF_270015600	isovaleryl-coA dehydrogenase - putative
LINF_270017000	cysteine desulfurase - putative
LINF_270017500	mitochondrial RNA binding protein 1
LINF_270017700	intraflagellar transport protein 88 - putative
LINF_270018600	hypothetical protein - conserved
LINF_270019000	T-complex protein 1 - beta subunit - putative
LINF_270019800	arginyl-tRNA synthetase - putative
LINF_270020500	60S acidic ribosomal protein P0 - putative
LINF_270021500	proteasome regulatory non-ATP-ase subunit 3 - putative
LINF_270021600	Cyclic nucleotide-binding domain containing protein - putative
LINF_270022100	Domain of unknown function (DUF543) - putative
LINF_270023800	hypothetical protein - conserved
LINF_270024100	eRF1 domain 1/eRF1 domain 2/eRF1 domain 3 - putative
LINF_270024200	hypothetical protein - conserved
LINF_270024900	glycosomal phosphoenolpyruvate carboxykinase - putative
LINF_270025600	trypanothione synthetase - putative
LINF_270025900	hypothetical protein - conserved
LINF_270027100	GMP-PDE - delta subunit - putative
LINF_270028100	RNA-binding protein - putative
LINF_270028400	hypothetical protein - conserved
LINF_270030700	GTP binding protein - putative
LINF_270032200	heat shock protein DNAJ - putative
LINF_270033830	hypothetical protein
LINF_270033860	hypothetical protein (non-ATG)
LINF_280006000	proteasome beta 3 subunit - putative
LINF_280007000	histone H2B variant
LINF_280007300	glycerol-3-phosphate dehydrogenase (FAD-dependent) - mitochondrial
LINF_280007600	carbonic anhydrase-like protein
LINF_280009700	Saccharopine dehydrogenase - putative
LINF_280010400	ribosomal protein S26 - putative
LINF_280012000	serine/threonine protein phosphatase catalytic subunit - putative
LINF_280014900	Archaic translocase outer mitochondrial membrane 46 kDa subunit - putative
LINF_280015100	Tctex-1 family - putative
LINF_280015200	40S ribosomal protein S14
LINF_280015700	ribosomal protein S20 - putative
LINF_280016200	hypothetical protein - conserved
LINF_280019300	haloacid dehalogenase-like hydrolase-like protein
LINF_280021300	ATP-dependent RNA helicase FAL1 - putative
LINF_280023600	proteasome regulatory non-ATP-ase subunit 2 - putative
LINF_280024700	methylthioribulose-1-phosphate dehydratase - putative
LINF_280026400	Leucine Rich Repeat/Leucine Rich repeat - putative
LINF_280028400	Mitochondrial import receptor subunit ATOM69 - putative
LINF_280028800	ribosomal protein S29 - putative
LINF_280029400	glycosomal membrane protein - putative
LINF_280029900	eukaryotic translation initiation factor - putative
LINF_280031300	alpha-KDE2
LINF_280031400	Vacuolar proton pump subunit B - putative
LINF_280032300	acyl-CoA dehydrogenase - putative
LINF_280033500	Coatomer subunit gamma
LINF_280034700	receptor for activated C kinase 1
LINF_280037300	glutamate dehydrogenase - putative
LINF_290005100	transcription factor-like protein
LINF_290005200	ribosomal protein L3-like protein
LINF_290005500	tryptophanyl-tRNA synthetase - putative
LINF_290005800	small GTP-binding protein - putative
LINF_290006100	proteasome regulatory non-ATPase subunit - putative
LINF_290007000	hypothetical protein - conserved
LINF_290007800	D-lactate dehydrogenase-like protein
LINF_290008100	hypothetical protein
LINF_290008200	TPR repeat/Tetratricopeptide repeat - putative
LINF_290009400	hypothetical protein - conserved
LINF_290010100	ADF/Cofilin
LINF_290012400	Peroxisomal targeting signal 2 receptor
LINF_290012700	heat shock protein 90 - putative
LINF_290012900	U-box domain protein - putative
LINF_290013400	CPC cysteine peptidase - Clan CA - family C1 - Cathepsin B-like
LINF_290013700	high mobility group protein homolog tdp-1 - putative
LINF_290014000	guanine deaminase - putative
LINF_290014300	hypothetical protein - conserved
LINF_290014400	ADP-ribosylation factor-like protein 3A - putative
LINF_290015200	5-histidylcysteine sulfoxide synthase - putative
LINF_290016600	ribosomal protein L1a - putative
LINF_290016900	ankyrin repeat protein
LINF_290017300	tryparedoxin-like protein
LINF_290017400	tryparedoxin 2 - putative
LINF_290018300	Hsp70 protein/TPR repeat/Tetratricopeptide repeat - putative
LINF_290018800	hypothetical protein - conserved
LINF_290019000	carnitine/choline acetyltransferase - putative
LINF_290021400	Nodulin-like - putative
LINF_290024600	paraflagellar rod protein 1D - putative
LINF_290025100	paraflagellar rod protein 1D - putative
LINF_290025600	Tob55 - putative
LINF_290025700	dihydrolipoamide dehydrogenase - putative
LINF_290027900	5'-AMP-activated protein kinase catalytic subunit alpha - putative
LINF_290028700	Domain of unknown function (DUF4139) - putative
LINF_290028800	UDP-glucose:Glycoprotein Glucosyltransferase - putative
LINF_290029100	C-8 sterol isomerase-like protein
LINF_290029300	rab-GDP dissociation inhibitor - putative
LINF_290029700	dynamin-1-like protein
LINF_290030100	metallo-peptidase - Clan MA(E) Family M1
LINF_290030900	mitogen-activated protein kinase kinase - putative
LINF_290031300	aspartyl aminopeptidase - putative
LINF_290032900	ATP-dependent phosphofructokinase
LINF_290033500	serine/threonine-protein kinase - putative
LINF_290036500	hypothetical protein - conserved
LINF_300005600	hypothetical protein - conserved
LINF_300006300	alkyldihydroxyacetonephosphate synthase
LINF_300006600	leucine-rich repeat protein - putative
LINF_300006800	2-hydroxy-3-oxopropionate reductase - putative
LINF_300007100	ribosomal RNA adenine dimethylase family protein - putative
LINF_300008500	kinesin - putative
LINF_300008800	phosphatase 2C - putative
LINF_300009700	aspartyl-tRNA synthetase - putative
LINF_300009900	bystin - putative
LINF_300010700	hypothetical protein - conserved
LINF_300011700	phospholipase C domain containing protein
LINF_300013000	hypothetical protein - conserved
LINF_300014400	adenosine kinase - putative
LINF_300016000	hypothetical protein - conserved
LINF_300016800	importin alpha - putative
LINF_300021000	hypothetical protein - conserved
LINF_300030900	reticulon domain protein - 22 kDa potentially aggravating protein (paple22)
LINF_300031800	hypothetical protein - conserved
LINF_300033400	hypothetical protein - conserved
LINF_300033900	hypothetical protein - conserved
LINF_300034400	aldehyde dehydrogenase - putative
LINF_300035000	glyceraldehyde 3-phosphate dehydrogenase - glycosomal
LINF_300035300	Protein of unknown function (DUF2817) - putative
LINF_300036000	eukaryotic translation initiation factor 3 subunit 7-like protein
LINF_300036700	S-adenosylmethionine decarboxylase
LINF_300037100	hypothetical protein - conserved
LINF_300038100	glutamyl-tRNA synthetase - putative
LINF_300038300	ankyrin repeat protein
LINF_300039500	PAS-domain containing phosphoglycerate kinase - putative
LINF_300040000	protein mkt1 - putative
LINF_300040800	S-adenosylmethionine synthetase
LINF_300041800	ATP synthase - epsilon chain - putative
LINF_300042300	ribosomal protein L15 - putative
LINF_300042600	hypothetical protein - conserved
LINF_300042700	Protein of unknown function (DUF3808)/Tetratricopeptide repeat - putative
LINF_300043000	60S acidic ribosomal protein P2 - putative
LINF_310005400	cyclophilin 5 - putative
LINF_310005800	hypothetical protein - conserved
LINF_310006100	intergrin alpha chain protein - putative
LINF_310007000	nucleolar protein - putative
LINF_310007500	TPR/MLP1/MLP2-like protein - putative
LINF_310009200	calpain-like cysteine peptidase - putative
LINF_310009700	cytoskeleton-associated protein CAP5.5 - putative
LINF_310011000	mevalonate kinase - putative
LINF_310016600	hypothetical protein - conserved
LINF_310017400	emp24/gp25L/p24 family/GOLD - putative
LINF_310017600	amidohydrolase - putative
LINF_310017700	amidohydrolase - putative
LINF_310018700	Pyrophosphate-energized vacuolar membrane proton pump 1 - putative
LINF_310022800	mitoribosomal protein mL43
LINF_310023000	cytochrome c oxidase VIII (COX VIII) - putative
LINF_310024100	hypothetical protein - conserved
LINF_310024200	hypothetical protein - conserved
LINF_310024900	nucleosome assembly protein-like protein
LINF_310026700	peptidase m20/m25/m40 family-like protein
LINF_310026800	ubiquitin-fusion protein
LINF_310028200	peptidase m20/m25/m40 family-like protein
LINF_310029700	prostaglandin f2-alpha synthase/D-arabinose dehydrogenase
LINF_310031000	ADP-ribosylation factor - putative
LINF_310033900	ubiquinol-cytochrome-c reductase-like protein
LINF_310034000	TerD domain containing protein - putative
LINF_310034500	2-oxoglutarate dehydrogenase, e3 component,lipoamidedehydrogenase-like protein
LINF_310035900	emp24/gp25L/p24 family/GOLD - putative
LINF_310036000	Endoplasmic reticulum-Golgi intermediate compartment protein 3
LINF_310036600	ADP-ribosylation factor - putative
LINF_310038500	acetyl-CoA carboxylase - putative
LINF_310039800	phosphoglycan beta 1 -3 galactosyltransferase 5
LINF_310040300	methylcrotonoyl-coa carboxylase biotinylated subunitprotein-like protein
LINF_320005100	nuclear segregation protein - putative
LINF_320005500	protein transport protein SEC13 - putative
LINF_320006300	hypothetical protein - conserved
LINF_320007600	hypothetical protein - conserved
LINF_320008600	hypothetical protein - conserved
LINF_320008700	hypothetical protein - conserved
LINF_320008800	Dynamin family/Root hair defective 3 GTP-binding protein (RHD3) - putative
LINF_320009000	19S proteasome non-atpase subunit 8
LINF_320009100	ATP-dependent RNA helicase - putative
LINF_320010500	profilin - putative
LINF_320011600	AMMECR1 - putative
LINF_320011800	AKAP7 2'5' RNA ligase-like domain/2'-5' RNA ligase superfamily - putative
LINF_320013000	RNA binding protein - putative
LINF_320013900	hypothetical protein - conserved
LINF_320014300	phenylalanyl-tRNA synthetase alpha chain - putative
LINF_320014400	60S ribosomal protein L18a - putative
LINF_320015100	Staphylococcal nuclease homologue/Tudor domain containing protein - putative
LINF_320015300	Calpain family cysteine protease - putative
LINF_320015700	chaperonin containing t-complex protein - putative
LINF_320016600	HECT-domain (ubiquitin-transferase) - putative
LINF_320017700	proteasome regulatory non-ATP-ase subunit - putative
LINF_320020800	Metalloprotease M41 FtsH - putative
LINF_320023000	coatomer subunit epsilon
LINF_320024000	iron superoxide dismutase - putative
LINF_320024300	chaperonin HSP60 - mitochondrial precursor
LINF_320025300	heat shock protein-like protein - putative
LINF_320025900	Domain of unknown function (DUF4200) - putative
LINF_320026300	cop-coated vesicle membrane protein p24 precursor - putative
LINF_320026400	Ras-related protein RAB2B - putative
LINF_320027600	hypothetical protein - conserved
LINF_320028100	SAC3/GANP/Nin1/mts3/eIF-3 p25 family/COP9 signalosome - subunit CSN8 - putative
LINF_320028300	U5 small nuclear ribonucleoprotein component - putative
LINF_320033800	hypothetical protein - conserved
LINF_320033900	ribosomal protein L27
LINF_320035300	proteasome regulatory non-ATP-ase subunit - putative
LINF_320036100	SNAP protein - putative
LINF_320036700	nucleoside diphosphate kinase b
LINF_320037600	leucine-rich repeat protein - putative
LINF_320037900	protein phosphatase 2A catalytic subunit - putative
LINF_320038900	pyrroline-5-carboxylate synthetase-like protein
LINF_320039300	mitochondrial RNA binding protein - putative
LINF_320039600	50S ribosome-binding GTPase/Miro-like protein/Ras family - putative
LINF_320040100	glucosamine-6-phosphate isomerase - putative
LINF_320040200	chaperonin alpha subunit - putative
LINF_320040600	dihydrolipoamide dehydrogenase - putative
LINF_320043300	hypothetical protein - conserved
LINF_320045900	Unconventional myosin
LINF_330005100	hypothetical protein
LINF_330011000	hypothetical protein - conserved
LINF_330013000	paraflagellar rod component - putative
LINF_330013100	intraflagellar transport protein 57/55 - putative
LINF_330016300	dnaj chaperone-like protein
LINF_330017800	hypothetical protein - conserved
LINF_330018200	hypothetical protein - conserved
LINF_330019600	Putative ATPase with AAA domain
LINF_330021300	glutamine aminotransferase - putative
LINF_330024000	ribulose-5-phosphate 3-epimerase - putative
LINF_330024300	3-ketoacyl-CoA reductase - putative
LINF_330024500	peptidase m20/m25/m40 family-like protein
LINF_330026900	small GTP-binding protein Rab18 - putative
LINF_330027200	nucleolar GTP-binding protein - putative
LINF_330028000	phosphoribosylpyrophosphate synthetase - putative
LINF_330028300	60S ribosomal protein L37
LINF_330030400	WD domain - G-beta repeat - putative
LINF_330032000	udp-glc 4'-epimerase - putative
LINF_330032400	succinyl-coA:3-ketoacid-coenzyme A transferase - mitochondrial precursor - putative
LINF_330033000	heat shock protein - putative
LINF_330033600	hypothetical protein - conserved
LINF_330033800	hypothetical protein - conserved
LINF_330034300	mitochondrial RNA binding complex 1 subunit
LINF_330034700	isocitrate dehydrogenase - putative
LINF_330034900	metallo-peptidase - Clan MF - Family M17
LINF_330038000	hypothetical protein - conserved
LINF_340005000	short chain dehydrogenase - putative
LINF_340005600	ascorbate peroxidase
LINF_340005700	glucose-6-phosphate 1-dehydrogenase - putative
LINF_340006100	adenylate kinase - putative
LINF_340006400	malate dehydrogenase
LINF_340006600	mitochondrial malate dehydrogenase
LINF_340007000	Domain of unknown function (DUF1935) - putative
LINF_340007400	intraflagellar transport protein 81 - putative
LINF_340008600	eukaryotic translation initiation factor 5 - putative
LINF_340011000	Gamma-soluble NSF attachment protein (SNAP-gamma)
LINF_340011200	hypothetical protein - conserved
LINF_340011700	enoyl-[acyl-carrier-protein] reductase - putative
LINF_340012100	proteasome regulatory non-ATPase subunit 11 - putative
LINF_340014000	elongation factor 1-beta
LINF_340017600	dihydroxyacetonephosphate acyltransferase
LINF_340018500	hypothetical protein
LINF_340022100	hypothetical protein - conserved
LINF_340022400	p25-alpha - putative
LINF_340025200	Regulator of chromosome condensation (RCC1) repeat - putative
LINF_340027200	Thioredoxin/Thioredoxin-like domain/Thioredoxin-like - putative
LINF_340028800	asparaginyl-tRNA synthetase - putative
LINF_340031700	hypothetical protein - conserved
LINF_340031800	Alba - putative
LINF_340032100	ruvB-like DNA helicase - putative
LINF_340033900	40S ribosomal protein S19 protein - putative
LINF_340035100	regulatory subunit of protein kinase a-like protein
LINF_340038100	hypothetical protein - conserved
LINF_340038800	NAD dependent epimerase/dehydratase family
LINF_340040800	aldose 1-epimerase-like protein
LINF_340041300	DNA topoisomerase IB - large subunit
LINF_340041900	ruvb-like 1 DNA helicase - putative
LINF_340043800	hypothetical protein - conserved
LINF_340044000	60S ribosomal protein L21 - putative
LINF_340044200	vacuolar ATP synthase catalytic subunit A - putative
LINF_340044900	serine palmitoyltransferase-like protein
LINF_340045400	phosphomannomutase-like protein
LINF_340047600	nucleolar protein family a member-like protein
LINF_340047900	hypothetical protein - conserved
LINF_340048500	hypothetical protein - conserved
LINF_340049100	Protein of uncharacterized function (DUF1620)
LINF_340050900	coatomer alpha subunit - putative
LINF_350005600	2-oxoisovalerate dehydrogenase beta subunit - mitochondrial precursor - putative
LINF_350005800	prohibitin - putative
LINF_350006100	Ubiquinol-cytochrome C reductase complex 14kD subunit - putative
LINF_350006500	hypothetical protein - conserved
LINF_350007500	60S ribosomal protein L30
LINF_350008400	3-keto-dihydrosphingosine reductase
LINF_350008600	hypothetical protein - conserved
LINF_350008700	enoyl-CoA hydratase/isomerase family protein - conserved
LINF_350008800	ATP-dependent DEAD-box RNA helicase - putative
LINF_350009200	40S ribosomal protein S3A - putative
LINF_350009400	Sperm-tail PG-rich repeat - putative
LINF_350011600	vacuolar ATP synthase subunit d - putative
LINF_350012100	proteasome activator protein pa26 - putative
LINF_350012200	AMP-activated protein kinase - gamma regulatory subunit
LINF_350012900	aspartate aminotransferase - putative
LINF_350014200	cell cycle sequence binding phosphoprotein (RBP33) - putative
LINF_350014400	aldose 1-epimerase - putative
LINF_350014500	aldose 1-epimerase - putative
LINF_350014800	casein kinase - putative
LINF_350016000	oligosaccharyl transferase subunit - putative
LINF_350016100	oligosaccharyl transferase subunit - putative
LINF_350016700	NADH-dependent fumarate reductase - putative
LINF_350017100	short chain dehydrogenase - putative
LINF_350017400	monothiol glutaredoxin - putative
LINF_350017500	ATPase (AAA) family
LINF_350017900	ubiquitin-conjugating enzyme E2 - putative
LINF_350018200	Thioredoxin - putative
LINF_350018700	mitochondrial processing peptidase - beta subunit - putative
LINF_350019000	threonyl-tRNA synthetase - putative
LINF_350019100	peroxisome targeting signal 1 receptor - putative
LINF_350019700	hypothetical protein - conserved
LINF_350019900	arginase
LINF_350020400	rieske iron-sulfur protein - mitochondrial precursor - putative
LINF_350022200	casein kinase II - putative
LINF_350022400	dynein-associated roadblock protein-like protein
LINF_350023700	60S ribosomal protein L5 - putative
LINF_350023800	60S ribosomal protein L5 - putative
LINF_350024700	UBX domain containing protein - putative
LINF_350025500	60S ribosomal protein L32
LINF_350025900	calcium motive p-type ATPase - putative
LINF_350026300	R-SNARE protein - putative
LINF_350026700	short chain dehydrogenase - putative
LINF_350027100	60S ribosomal protein L12 - putative
LINF_350027200	RNA-binding protein - putative
LINF_350027600	hypothetical protein - conserved
LINF_350032600	acyl-CoA dehydrogenase - putative
LINF_350032700	galactokinase-like protein
LINF_350035100	chaperone protein DNAj - putative
LINF_350035400	trypanothione-dependent glyoxalase I
LINF_350035500	phospholipase A1 - putative
LINF_350036100	glycerol kinase - glycosomal - putative
LINF_350036300	ATP-dependent RNA helicase - putative
LINF_350037700	cystathione gamma lyase - putative
LINF_350038800	6-phosphogluconate dehydrogenase - decarboxylating - putative
LINF_350039100	hypothetical protein - conserved
LINF_350040300	hypothetical protein - conserved
LINF_350041000	CRAL/TRIO - N-terminal domain/CRAL/TRIO domain containing protein - putative
LINF_350042400	Gim5A protein - putative
LINF_350042600	hypothetical protein - conserved
LINF_350043000	60S ribosomal protein L27A/L29 - putative
LINF_350043300	60S ribosomal protein L23 - putative
LINF_350043400	60S ribosomal protein L23 - putative
LINF_350043800	proteasome beta 2 subunit - putative
LINF_350043900	30S Ribosomal protein S17-like protein
LINF_350044000	T-complex protein 1 - eta subunit - putative
LINF_350046300	Regulatory subunit of type II PKA R-subunit - putative
LINF_350047100	poly(A)-binding protein 2
LINF_350047400	Protein of unknown function (DUF2009) - putative
LINF_350050500	CS domain containing protein - putative
LINF_350052100	chaperone protein DNAj - putative
LINF_350052700	PACRGB
LINF_350052900	Hsp70 protein - putative
LINF_350053100	glyceraldehyde-3-phosphate dehydrogenase-like protein
LINF_350053300	cyclophilin 40
LINF_350054100	proteasome alpha 1 subunit - putative
LINF_350054200	Archaic translocase outer mitochondrial membrane 40 - putative
LINF_350054900	hypothetical protein - conserved
LINF_350055900	polyadenylate-binding protein 1
LINF_350058900	isopentenyl-diphosphate delta-isomerase (type II) - putative
LINF_360005700	stress-inducible protein STI1 homolog
LINF_360006800	elongation factor 2
LINF_360006900	elongation factor 2
LINF_360007000	elongation factor 2
LINF_360007400	dolicholphosphate-mannose synthase
LINF_360007700	eukaryotic translation initiation factor 3 subunit L - putative
LINF_360008300	dolicholphosphate-mannose synthase - putative
LINF_360008400	20S proteasome subunit
LINF_360008800	Integral membrane protein DUF106 - putative
LINF_360010100	hypothetical protein - conserved
LINF_360011600	ubiquitin/ribosomal protein S27a - putative
LINF_360011800	Mitochondrial ATP synthase epsilon chain - putative
LINF_360014600	eukaryotic translation initiation factor 6 (eIF-6) - putative
LINF_360015100	40S ribosomal protein S18 - putative
LINF_360015500	hypothetical protein - conserved
LINF_360016500	ribosomal protein L24 - putative
LINF_360017100	hypothetical protein - conserved
LINF_360017200	short chain 3-hydroxyacyl-CoA dehydrogenase - putative
LINF_360017500	hypothetical protein - conserved
LINF_360018400	fructose-1 -6-bisphosphate aldolase
LINF_360018600	hypothetical protein - conserved
LINF_360019100	N-acetyltransferase subunit Nat1 - putative
LINF_360019800	Transitional endoplasmic reticulum ATPase - putative
LINF_360021400	serine/threonine protein kinase - putative
LINF_360021500	serine/threonine protein kinase - putative
LINF_360022300	proteasome subunit alpha type-1 - putative
LINF_360022600	clathrin heavy chain - putative
LINF_360022700	poly-zinc finger protein 2 - putative
LINF_360022900	proteasome subunit beta type-5 - putative
LINF_360023900	hypothetical protein - conserved
LINF_360024800	DEAD box RNA helicase - putative
LINF_360026100	DNA mismatch repair protein MSH6 - putative
LINF_360028100	chaperone protein DNAj - putative
LINF_360028400	DEAD box RNA helicase - putative
LINF_360029600	developmentally regulated GTP-binding protein 1 - putative
LINF_360030300	glucokinase
LINF_360031200	sterol 24-c-methyltransferase - putative
LINF_360034400	dihydrolipoamide acetyltransferase precursor - putative
LINF_360036600	40S ribosomal protein S24e
LINF_360037500	succinyl-CoA ligase [GDP-forming] beta-chain - putative
LINF_360038800	fibrillarin
LINF_360039100	ATP synthase - putative
LINF_360040400	14-3-3 protein 1 - putative
LINF_360041100	60S ribosomal protein L22 - putative
LINF_360041300	Macro domain containing protein - putative
LINF_360042400	hypothetical protein - conserved
LINF_360042700	short chain dehydrogenase-like protein
LINF_360043200	NIPSNAP - putative
LINF_360044500	cysteine synthase
LINF_360046600	transcription factor btf3 - putative
LINF_360047300	glycyl tRNA synthetase - putative
LINF_360047700	eukaryotic translation initiation factor 3 subunit 2 - putative
LINF_360048000	S-adenosylhomocysteine hydrolase
LINF_360048400	hypothetical protein - conserved
LINF_360049800	phosphoglycerate mutase family member 5 - putative
LINF_360050900	oxidoreductase - putative
LINF_360052600	predicted C2 domain protein
LINF_360052900	19S proteasome regulatory subunit
LINF_360053200	gamma-tubulin complex subunit - putative
LINF_360053900	hypothetical protein - conserved
LINF_360054500	hypothetical protein - conserved
LINF_360055900	60S acidic ribosomal protein - putative
LINF_360058600	hypothetical protein - conserved
LINF_360060400	Casein kinase II subunit beta - putative
LINF_360060500	hypothetical protein - conserved
LINF_360060900	VHS domain containing protein - putative
LINF_360061000	kinesin-like protein - putative
LINF_360061300	aldehyde dehydrogenase - putative
LINF_360062400	hypothetical protein - conserved
LINF_360062900	hypothetical protein - conserved
LINF_360063100	ubiquinone biosynthesis methyltransferase - putative
LINF_360066000	isoleucyl-tRNA synthetase - putative
LINF_360068400	flagellum targeting protein kharon1 - putative
LINF_360070400	hypothetical protein - conserved
LINF_360070500	eukaryotic translation initation factor 4 gamma - putative
LINF_360070800	ABC1 family/Phosphotransferase enzyme family - putative
LINF_360072700	chaperone protein DNAj - putative
LINF_360077100	similarity to endo-1-like protein
LINF_360077600	Sperm tail/Sperm tail C-terminal domain containing protein - putative
LINF_360078300	2 -3-bisphosphoglycerate-independent phosphoglycerate mutase
LINF_360079100	hypothetical protein - conserved
LINF_360079300	serine peptidase clan SC - family S9A - putative
LINF_360081100	T-complex protein 1 - theta subunit - putative
LINF_360081200	Ribosomal protein L1p/L10e family - putative
LINF_360081500	protein disulfide isomerase 2
LINF_360081900	eukaryotic translation initiation factor 3 subunit 8 - putative
LINF_360082300	cytochrome oxidase subunit IX - putative

## Sheet: Table S9
Table S9. Identified proteins with predicted molecular weight higher than 200 kDa
Gene ID	Unique peptides	Description
LINF_160020700	1	kinesin - putative
LINF_210013800	34	CCR4-NOT transcription complex subunit 1
LINF_250015700	42	dynein heavy chain - putative
LINF_290011200	10	ATP-binding cassette subfamily A - member 1 - putative
LINF_020006500	3	Vps51/Vps67 - putative
LINF_140016800	1	dynein heavy chain - putative
LINF_260012300	2	hypothetical protein - conserved
LINF_270024300	2	dynein heavy chain - putative
LINF_270033300	1	dynein heavy chain - putative
LINF_030007500	2	Apolipoprotein A1/A4/E domain containing protein
LINF_030007500	2	Apolipoprotein A1/A4/E domain containing protein
LINF_090013600	1	ubiquitin ligase - putative
LINF_140017300	4	kinesin K39 - putative
LINF_160012700	4	ubiquitin hydrolase - putative
LINF_210018000	1	kinesin - putative
LINF_230022400	2	dynein heavy chain - putative
LINF_260015200	7	dynein heavy chain - putative
LINF_280037000	4	dynein heavy chain - putative
LINF_350010800	2	hypothetical protein - conserved
LINF_070008000	4	ubiquitin-protein ligase-like - putative
LINF_070008000	1	ubiquitin-protein ligase-like - putative
LINF_180013400	1	hypothetical protein - conserved
LINF_190011400	7	hypothetical protein - conserved
LINF_260019200	5	MORN repeat/FYVE zinc finger containing protein - putative
LINF_260029300	2	Fibronectin type III domain containing protein - putative
LINF_270010200	124	calpain-like cysteine peptidase - putative
LINF_300022500	7	CLASP N terminal - putative
LINF_330012100	6	hypothetical protein - conserved
LINF_340020700	1	hypothetical protein - conserved
LINF_030011900	8	DEAD/DEAH box helicase/Type III restriction enzyme - res subunit - putative
LINF_080009300	6	hypothetical protein - conserved
LINF_300023000	4	Flagellar-associated PapD-like/Zeta toxin - putative
LINF_310038500	22	acetyl-CoA carboxylase - putative
LINF_320039000	2	Flagellar Member 7
LINF_130022000	40	dynein heavy chain - putative

[truncated: 9 more sheets: Table S10, Table S11, Table S12, Table S13, Table S14, Table S15, Table S16, Table S17, Table S18]
